# Supplementary material
Source: MDPI journal article supplement (https://www.mdpi.com/2673-6284/13/2/8)
Supplement: s1 [file s1]

# **Novel *Pseudomonas* species prevent the growth of the phytopathogenic fungus *Aspergillus flavus***

Franciene Rabiço Oliveira<sup>a,b</sup>, Tiago Cabral Borelli<sup>a,c</sup>, Maria de Lourdes Teixeira de Moraes Polizeli<sup>b</sup>, Ricardo Roberto da Silva<sup>c</sup>, Rafael Silva-Rocha<sup>d</sup>, María-Eugenia Guazzaroni<sup>b\*</sup>

<sup>a</sup>Department of Cell and Molecular Biology, Faculdade de Medicina de Ribeirão Preto, University of São Paulo, São Paulo, SP, Brazil

<sup>b</sup>Department of Biology, Faculdade de Filosofia, Ciências e Letras de Ribeirão Preto, University of São Paulo, São Paulo, SP, Brazil

<sup>c</sup>Department of Biomolecular Sciences, Faculdade de Ciências Farmacêuticas de Ribeirão Preto, University of São Paulo, Ribeirão Preto, Brasil

<sup>d</sup>ByMyCell Inova Simples. Av. Dra. Nadir Aguiar, 1805 – Supera Parque, Ribeirão Preto, SP, Brazil

\*Correspondence to:      María-Eugenia Guazzaroni, [meguazzaroni@ffclrp.usp.br](mailto:meguazzaroni@ffclrp.usp.br)

Faculdade de Filosofia, Ciências e Letras de Ribeirão Preto,  
Universidade de São Paulo.

Av. Bandeirantes, 3.900. CEP: 14049-901, Ribeirão Preto, São Paulo, Brazil.

## **Supporting Materials**

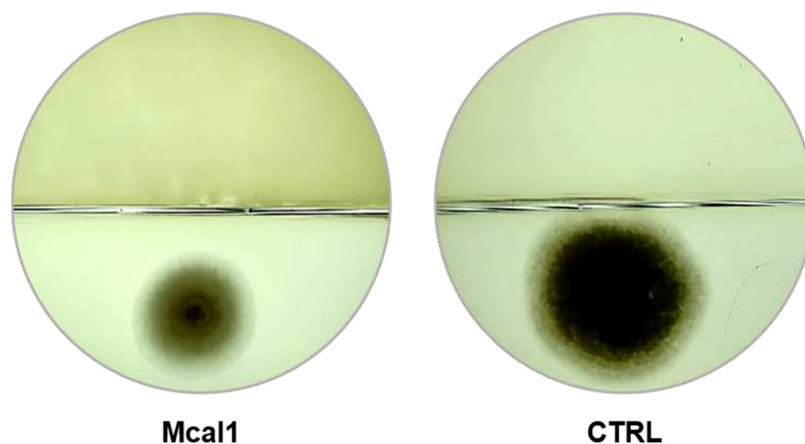

**Figure S1.** Antibacterial activity of VOCs of Mcal1 strain on LB medium in 2-compartment Petri dishes.

**Table S1.** Digital DNA-DNA hybridization (dDDH) values between the BJa3 genome and the selected typestrain genomes.

| Strain                                      | dDDH (d4, in %) |
|---------------------------------------------|-----------------|
| <i>Pseudomonas soli</i> LMG 27941           | 92,1            |
| <i>Pseudomonas maumuensis</i> COW77         | 56,5            |
| <i>Pseudomonas peradeniyensis</i> BW13M1    | 42,1            |
| <i>Pseudomonas mosselii</i> DSM 17497       | 40,9            |
| <i>Pseudomonas muyukensis</i> COW39         | 36,4            |
| <i>Pseudomonas xantholysinigenes</i> RW9S1A | 35,5            |
| <i>Pseudomonas sichuanensis</i> WCHPs060039 | 34,5            |
| <i>Pseudomonas oryziphila</i> 1257T         | 34,2            |
| <i>Pseudomonas entomophila</i> L48          | 34,1            |
| <i>Pseudomonas xanthosomatis</i> COR54      | 32,6            |
| <i>Pseudomonas fakonensis</i> COW40         | 32,4            |
| <i>Pseudomonas wayambapatensis</i> RW3S1    | 28,8            |
| <i>Pseudomonas taiwanensis</i> DSM 21245    | 28,1            |

**Table S2.** Digital DNA-DNA hybridization (dDDH) values between the MCal1 genome and the selected typestrain genomes.

| Strain                                      | dDDH (d4, in %) |
|---------------------------------------------|-----------------|
| <i>Pseudomonas glycinae</i> MS586           | 52              |
| <i>Pseudomonas gozinkensis</i> LMG 31526    | 51,6            |
| <i>Pseudomonas kribbensis</i> KCTC 32541T   | 42,9            |
| <i>Pseudomonas allokribbensis</i> LMG31525T | 42,5            |
| <i>Pseudomonas bananamidigenes</i> BW11P2   | 39,4            |
| <i>Pseudomonas botevensis</i> COW3          | 34,6            |
| <i>Pseudomonas koreensis</i> LMG 21318      | 34,2            |
| <i>Pseudomonas koreensis</i> JCM 14769      | 34,1            |
| <i>Pseudomonas atagonensis</i> PS14         | 33,6            |
| <i>Pseudomonas monsensis</i> PGSB 8459      | 33,2            |
| <i>Pseudomonas ekonensis</i> COR58          | 33              |
| <i>Pseudomonas iranensis</i> SWRI54         | 31,8            |
| <i>Pseudomonas atacamensis</i> M7D1         | 31,7            |
| <i>Pseudomonas moraviensis</i> LMG 24280    | 31,6            |

**Table S3.** Genome statistics for *Pseudomonas* sp. BJa3 and MCal1.

| Attribute        | BJa3            | MCal1           |
|------------------|-----------------|-----------------|
| Size (bp)        | 5952323         | 6264134         |
| contigs (n°)     | 750             | 155             |
| coverage (Avg)   | 270             | 251.1           |
| GC (%)           | 64.05           | 60.42           |
| Coding sequences | 5272            | 5650            |
| tRNA             | 4               | 73              |
| rRNA             | 77              | 5               |
| tmRNA            | 1               | 1               |
| Plasmid          | 0               | 0               |
| GenBank          | JAOXMC000000000 | JAKUMP000000000 |
| SRA              | PRJNA808800     | PRJNA808800     |
| Isolated from    | Garden soil     | Sugarcane Juice |
